# Supplementary material for: Impact of Single-Session Intraoral and Extraoral Photobiomodulation on Pain Control after Extraction of Impacted Mandibular Third Molar: A Pilot Study
Source: MDPI journal article supplement (doi:10.3390/app14083268), 2024-04-12
Supplement: s1 [file s1]

**Table S1.** The scores of each patient's daily activities questionnaire in both groups

| Gruppi                | Paziente nr. | ISOLAMENTO SOCIALE |                               | MANGIARE      |                |                          |                       |                      |               | PARLARE |                     |                          | SONNO E ALTRO |                    | ASPETTO FISICO                             | Totale |
|-----------------------|--------------|--------------------|-------------------------------|---------------|----------------|--------------------------|-----------------------|----------------------|---------------|---------|---------------------|--------------------------|---------------|--------------------|--------------------------------------------|--------|
|                       |              | Attività sociali   | Attività in hobby e interessi | Normale dieta | Gusto del cibo | Capacità di masticazione | Deglutizione del cibo | Apertura della bocca | Alito cattivo | Voce    | Abilità nel parlare | Abilità nel farsi capire | Vertigini     | Problemi nel sonno | Cambiamenti nell'aspetto dopo l'operazione |        |
| Gruppo Test (TG)      | 1            | 0                  | 0                             | 1             | 0              | 1                        | 0                     | 1                    | 0             | 0       | 0                   | 0                        | 0             | 0                  | 0                                          | 3      |
|                       | 2            | 1                  | 0                             | 3             | 0              | 2                        | 1                     | 2                    | 0             | 1       | 1                   | 1                        | 1             | 1                  | 1                                          | 15     |
|                       | 3            | 0                  | 0                             | 1             | 1              | 1                        | 0                     | 1                    | 0             | 0       | 0                   | 0                        | 0             | 1                  | 0                                          | 5      |
|                       | 4            | 0                  | 0                             | 0             | 0              | 1                        | 0                     | 1                    | 0             | 0       | 0                   | 0                        | 0             | 0                  | 0                                          | 2      |
|                       | 5            | 0                  | 0                             | 1             | 0              | 0                        | 0                     | 1                    | 0             | 0       | 0                   | 0                        | 0             | 0                  | 0                                          | 2      |
|                       | 6            | 0                  | 0                             | 0             | 0              | 1                        | 0                     | 1                    | 0             | 0       | 0                   | 0                        | 0             | 0                  | 0                                          | 2      |
|                       | 7            | 0                  | 0                             | 0             | 0              | 0                        | 0                     | 1                    | 0             | 0       | 0                   | 0                        | 0             | 0                  | 0                                          | 1      |
|                       | 8            | 1                  | 1                             | 1             | 1              | 1                        | 1                     | 2                    | 1             | 1       | 2                   | 1                        | 1             | 1                  | 0                                          | 15     |
|                       | 9            | 1                  | 0                             | 1             | 1              | 1                        | 1                     | 1                    | 1             | 1       | 1                   | 1                        | 1             | 1                  | 1                                          | 13     |
|                       | 10           | 0                  | 0                             | 3             | 0              | 2                        | 0                     | 2                    | 0             | 0       | 1                   | 0                        | 0             | 1                  | 1                                          | 10     |
|                       | 11           | 1                  | 1                             | 3             | 1              | 3                        | 3                     | 3                    | 0             | 0       | 3                   | 0                        | 0             | 3                  | 2                                          | 23     |
| Gruppo Controllo (CG) | 12           | 0                  | 0                             | 1             | 0              | 2                        | 0                     | 0                    | 0             | 0       | 0                   | 0                        | 0             | 0                  | 0                                          | 3      |
|                       | 13           | 0                  | 0                             | 1             | 0              | 2                        | 0                     | 1                    | 0             | 0       | 1                   | 0                        | 0             | 0                  | 0                                          | 5      |
|                       | 14           | 0                  | 0                             | 2             | 0              | 2                        | 0                     | 2                    | 0             | 0       | 0                   | 0                        | 0             | 0                  | 0                                          | 6      |
|                       | 15           | 0                  | 0                             | 2             | 0              | 2                        | 0                     | 2                    | 0             | 0       | 1                   | 0                        | 0             | 1                  | 1                                          | 9      |
|                       | 16           | 0                  | 0                             | 0             | 0              | 0                        | 0                     | 0                    | 0             | 0       | 0                   | 0                        | 0             | 0                  | 0                                          | 0      |
|                       | 17           | 1                  | 0                             | 3             | 0              | 3                        | 0                     | 3                    | 0             | 0       | 2                   | 0                        | 0             | 0                  | 1                                          | 13     |
|                       | 18           | 2                  | 0                             | 3             | 1              | 3                        | 0                     | 3                    | 0             | 0       | 3                   | 0                        | 0             | 3                  | 3                                          | 21     |
|                       | 19           | 3                  | 0                             | 3             | 1              | 3                        | 1                     | 3                    | 0             | 1       | 3                   | 0                        | 1             | 3                  | 3                                          | 25     |
|                       | 20           | 1                  | 0                             | 3             | 0              | 3                        | 0                     | 3                    | 0             | 0       | 3                   | 0                        | 1             | 3                  | 3                                          | 20     |
|                       | 21           | 2                  | 2                             | 2             | 0              | 3                        | 1                     | 3                    | 0             | 0       | 3                   | 0                        | 1             | 2                  | 2                                          | 21     |
|                       | 22           | 1                  | 0                             | 1             | 0              | 3                        | 1                     | 3                    | 0             | 1       | 2                   | 0                        | 1             | 2                  | 2                                          | 17     |

Per niente=0; Un po'=1; Abbastanza=2; Molto=3
